# Supplementary material for: Does androgen deprivation impact associations between cognition and strength, fitness and function in community-dwelling men with prostate cancer? A cross-sectional study
Source: HighWire-hosted journal article supplement (doi:10.1136/bmjopen-2021-058478), 2021-12-01
Supplement: bmjopen-2021-058478supp001_data_supplement.pdf [file bmjopen-2021-058478supp001_data_supplement.pdf]

## SUPPLEMENT

**Supplementary Table 1.** The associations between strength, function and cognition in men with prostate cancer treated with androgen deprivation therapy (ADT; n=70), prostate cancer controls (PCON; n=52) and healthy controls (HCON; n=70) pooled.

| Variable                                 | Leg press 3RM    | Grip strength     | Gait speed       | 400m walk         | TUGC              |
|------------------------------------------|------------------|-------------------|------------------|-------------------|-------------------|
| <b>Rey Auditory Verbal Learning Test</b> |                  |                   |                  |                   |                   |
| Immediate recall                         | <b>0.195*</b>    | 0.111             | <b>0.159*</b>    | <b>-0.300***</b>  | <b>-0.272***</b>  |
| Verbal learning                          | <b>0.184*</b>    | 0.143             | <b>0.184*</b>    | <b>-0.368***</b>  | <b>-0.296***</b>  |
| Delayed recall                           | 0.062            | 0.106             | 0.139            | <b>-0.298***</b>  | <b>-0.189*</b>    |
| <b>Digit span</b>                        |                  |                   |                  |                   |                   |
| Verbal recall                            | 0.146            | 0.106             | 0.138            | <b>-0.248****</b> | <b>-0.263***</b>  |
| Verbal working memory                    | 0.131            | 0.102             | <b>0.191*</b>    | <b>-0.153*</b>    | <b>-0.240****</b> |
| <b>Trail making test</b>                 |                  |                   |                  |                   |                   |
| Visuomotor speed                         | <b>-0.274***</b> | <b>-0.246****</b> | <b>-0.294***</b> | <b>0.354***</b>   | <b>0.284***</b>   |
| Task switching                           | <b>-0.307***</b> | <b>-0.233****</b> | <b>-0.181*</b>   | <b>0.331***</b>   | <b>0.270***</b>   |
| Executive function                       | <b>-0.277***</b> | <b>-0.194****</b> | -0.116           | <b>0.276***</b>   | <b>0.225****</b>  |
| <b>CogState</b>                          |                  |                   |                  |                   |                   |
| Simple reaction time                     | <b>0.244****</b> | <b>0.222****</b>  | <b>0.195****</b> | <b>-0.202****</b> | <b>-0.252***</b>  |
| Choice reaction time                     | <b>0.276***</b>  | <b>0.317***</b>   | <b>0.160*</b>    | <b>-0.225****</b> | <b>-0.255****</b> |
| Working memory speed                     | <b>0.177*</b>    | <b>0.183*</b>     | <b>0.155*</b>    | <b>-0.187*</b>    | <b>-0.234****</b> |
| Working memory accuracy                  | <b>0.206*</b>    | 0.106             | 0.040            | -0.090            | <b>-0.150*</b>    |
| Executive function errors                | <b>0.233****</b> | <b>0.242****</b>  | <b>0.152*</b>    | <b>-0.284***</b>  | <b>-0.229****</b> |
| <b>CogState composite scores</b>         |                  |                   |                  |                   |                   |
| Psychomotor-attention                    | <b>0.283***</b>  | <b>0.307***</b>   | <b>0.193**</b>   | <b>-0.233**</b>   | <b>-0.276***</b>  |

|                         |                 |                 |                |                  |                  |
|-------------------------|-----------------|-----------------|----------------|------------------|------------------|
| Working memory-learning | <b>0.253**</b>  | <b>0.199**</b>  | 0.123          | <b>-0.176*</b>   | <b>-0.247***</b> |
| Global cognition        | <b>0.338***</b> | <b>0.323***</b> | <b>0.205**</b> | <b>-0.292***</b> | <b>-0.330***</b> |

Data are Pearson's correlation coefficient. P<0.05, \*\*P<0.01, \*\*\*P<0.001. Visuomotor speed (Trail making Test part A), Task Switching (Trail making Test part B), Executive Function (Trail making Test part B-A); Immediate recall (Rey Auditory Verbal Learning Test [RAVLT] trial 1); Verbal learning (RAVLT trial 1-5 inclusive); Delayed recall (RAVLT trial 7); Verbal recall (Digit Span forwards); Verbal working memory (Digit Span backward). CogState measures: Simple reaction time (DET speed); Choice reaction time (IND speed); Working memory speed (ONB speed), Working memory accuracy (ONB accuracy), Visuospatial executive function (GML errors); Psychomotor-attention (DET and IDN); Working-memory and learning (OCL and ONB), Global cognition (DET, IDN, and OCL)

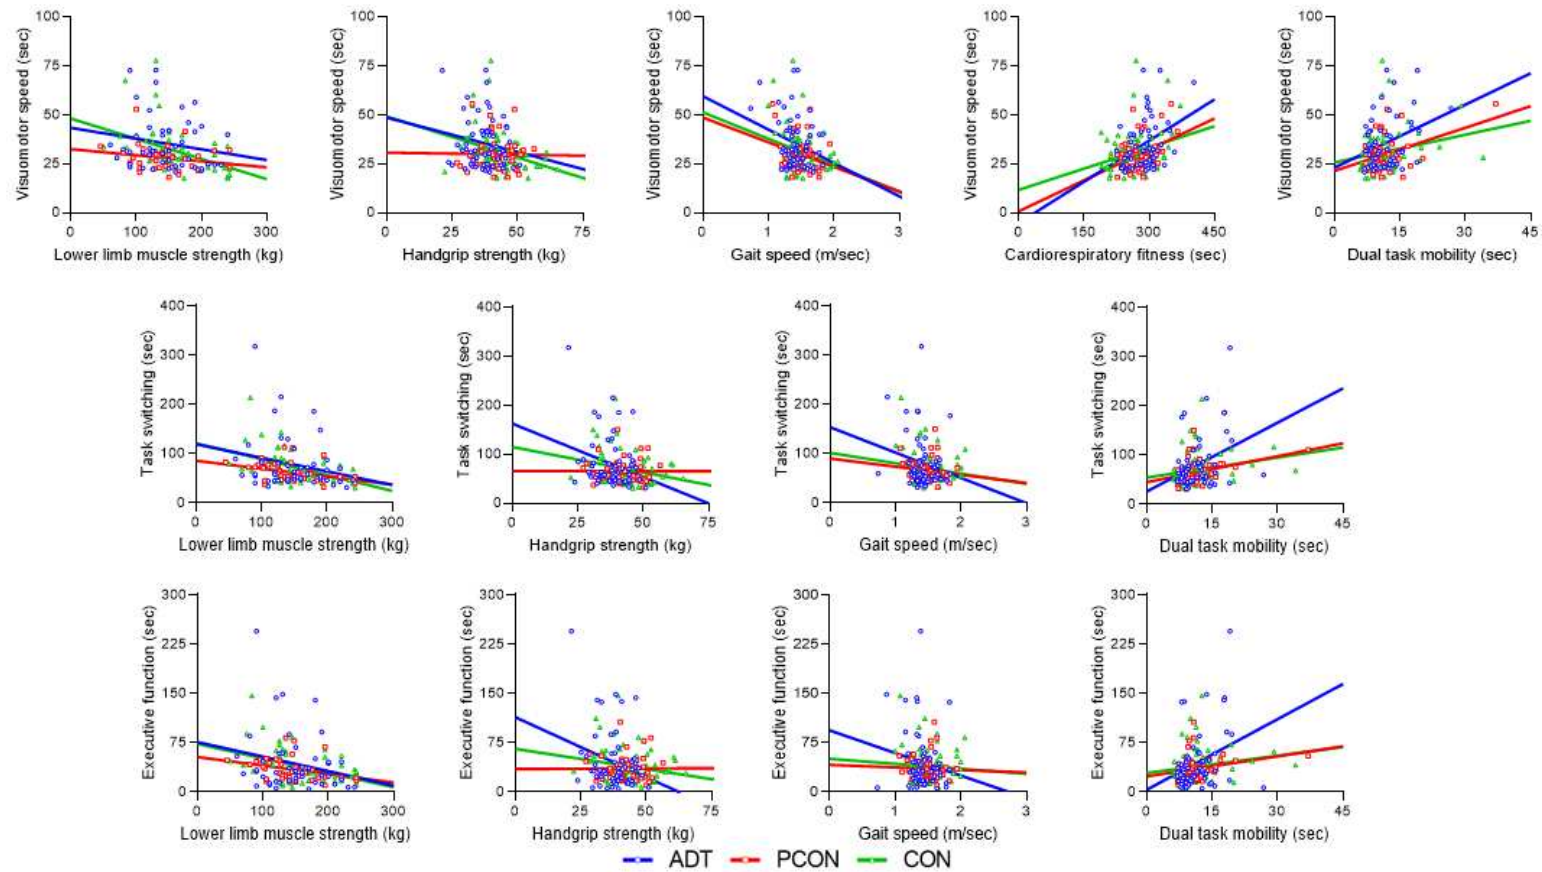

**Supplementary Figure 1.** Scatterplots of the relationship between measures of lower limb muscle strength (leg press three-repetition maximum), handgrip strength (handheld dynamometry), gait speed (4m usual walk), cardiorespiratory fitness (400m walk) and dual-task mobility (timed-up-

and-go with cognitive task) and visuo-motor speed (trail making test A), task switching (trail making test B), executive function (trail making test B-A) in men treated with androgen deprivation therapy (ADT), prostate cancer controls (PCON) and non-PCA controls (CON). ^ P<0.05 compared to CON.

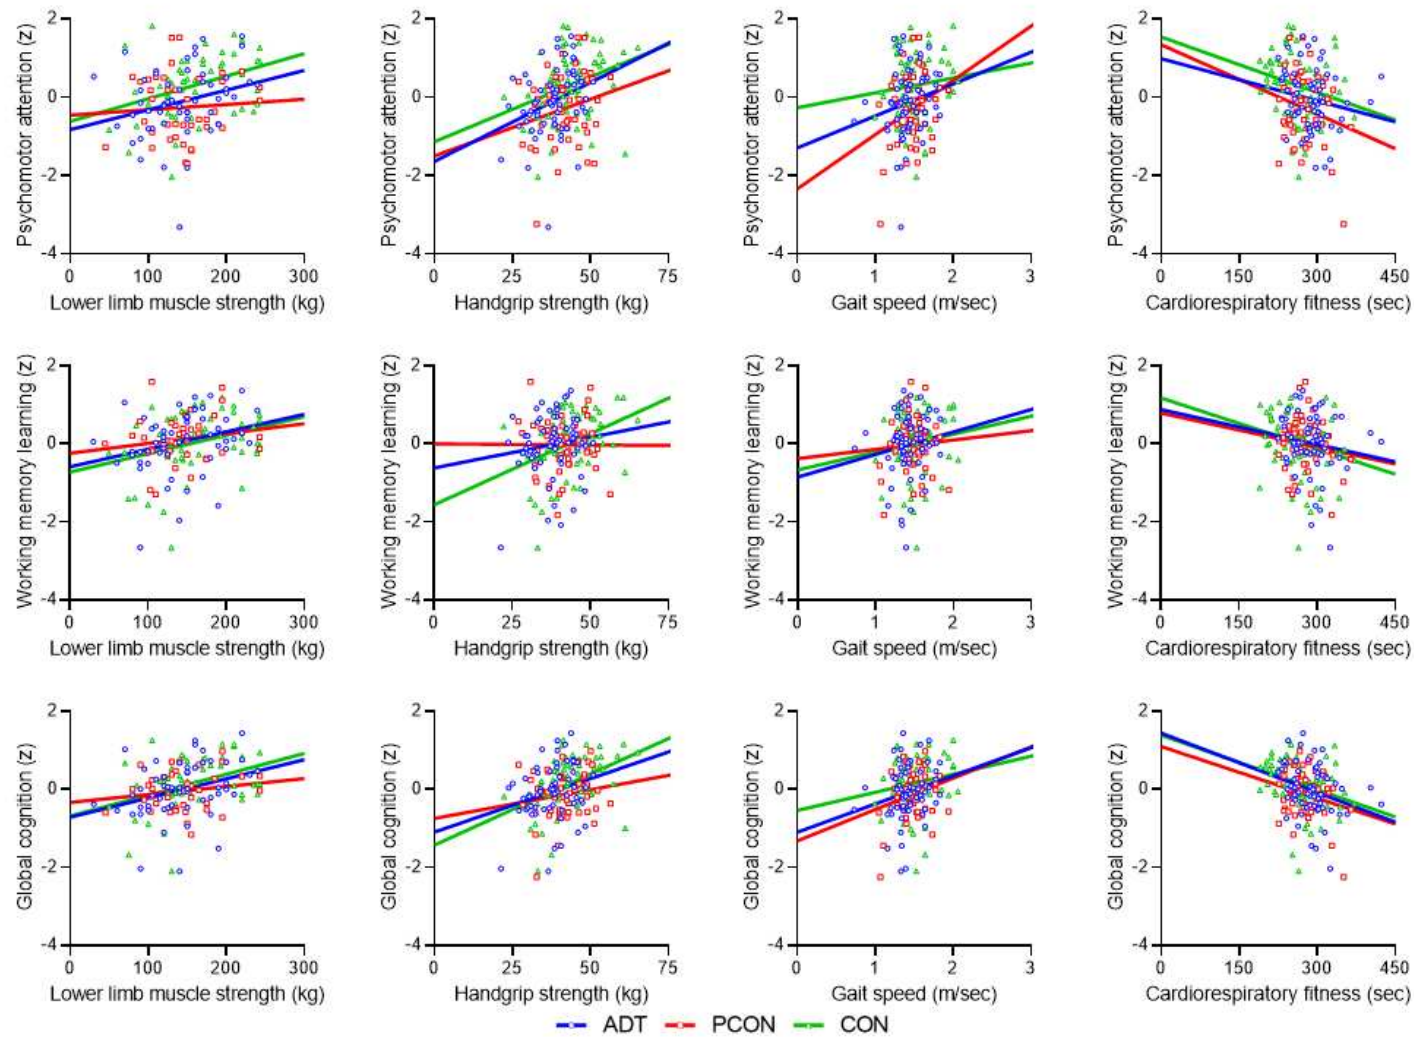

**Supplementary Figure 2.** Scatterplots of the relationship between measures of lower limb muscle strength (leg press three-repetition maximum), handgrip strength (handheld dynamometry), gait speed (4m usual walk), cardiorespiratory fitness (400m walk) and dual-task mobility (timed-up-and-go with cognitive task) and Cogstate psychomotor-attention composite score, Cogstate working memory-learning composite score and Cogstate global cognitive function score in men treated with androgen deprivation therapy (ADT), prostate cancer controls (PCON) and non-PCA controls (CON). ^ P<0.05 compared to CON.
